# Supplementary material for: 2,3-Diaminopropanols Obtained from d-Serine as Intermediates in the Synthesis of Protected 2,3-l-Diaminopropanoic Acid (l-Dap) Methyl Esters
Source: PubMed Central journal article supplement (PMC7145313; doi:10.3390/molecules25061313), 2020-03-13

## 2,3-Diaminopropanols obtained from D-serine as intermediates in the synthesis of protected 2,3-L-diaminopropanoic acid (L-Dap) methyl esters

Andrea Temperini, Donatella Aiello, Fabio Mazzotti, Constantinos M. Athanassopoulos, Pierantonio De Luca and Carlo Siciliano \*

### *Supplementary Materials*

*Page 2.* Figure S1: <sup>1</sup>H NMR spectrum of **2**; Figure S2: <sup>13</sup>C NMR spectrum of **2**.

*Page 3.* Figure S3: <sup>1</sup>H NMR spectrum of **3**; Figure S4: <sup>13</sup>C NMR spectrum of **3**.

*Page 4.* Figure S5: <sup>1</sup>H NMR spectrum of **4**; Figure S6: <sup>13</sup>C NMR spectrum of **4**.

*Page 5.* Figure S7: <sup>1</sup>H NMR spectrum of **5**; Figure S8: <sup>13</sup>C NMR spectrum of **5**.

*Page 6.* Figure S9: <sup>1</sup>H NMR spectrum of **6**; Figure S10: <sup>13</sup>C NMR spectrum of **6**.

*Page 7.* Figure S11: <sup>1</sup>H NMR spectrum of **7**; Figure S12: <sup>13</sup>C NMR spectrum of **7**.

*Page 8.* Figure S13: <sup>1</sup>H NMR spectrum of **8**; Figure S14: <sup>13</sup>C NMR spectrum of **8**.

*Page 9.* Figure S15: <sup>1</sup>H NMR spectrum of **9**; Figure S16: <sup>13</sup>C NMR spectrum of **9**.

*Page 10.* Figure S17: <sup>1</sup>H NMR spectrum of **10**; Figure S18: <sup>13</sup>C NMR spectrum of **10**.

*Page 11.* Figure S19: <sup>1</sup>H NMR spectrum of **11**; Figure S20: <sup>13</sup>C NMR spectrum of **11**.

*Page 12.* Figure S21: <sup>1</sup>H NMR spectrum of **12**; Figure S22: <sup>13</sup>C NMR spectrum of **12**.

*Page 13.* Figure S23: <sup>1</sup>H NMR spectrum of **13**; Figure S24: <sup>13</sup>C NMR spectrum of **13**.

*Page 14.* Figure S25: <sup>1</sup>H NMR spectrum of **20**; Figure S26: <sup>13</sup>C NMR spectrum of **20**.

*Page 15.* Figure S27: <sup>1</sup>H NMR spectrum of **21**; Figure S28: <sup>13</sup>C NMR spectrum of **21**.

*Page 16.* Figures S29-S30: ESI(+) MS spectra of **4** and **5**.

*Page 17.* Figures S31-S32: ESI(+) MS spectra of **6** and **7**.

*Page 18.* Figures S33-S34: ESI(+) MS spectra of **8** and **9**.

*Page 19.* Figures S35-S36: ESI(+) MS spectra of **10** and **11**.

*Page 20.* Figure S37: RP U-HPLC/MS analysis of crude **23** and crude **24**.

*Page 21.* Figures S38-S39: ESI(+) MS spectra of **23** and **24**.

Figure S1: <sup>1</sup>H NMR spectrum of 2

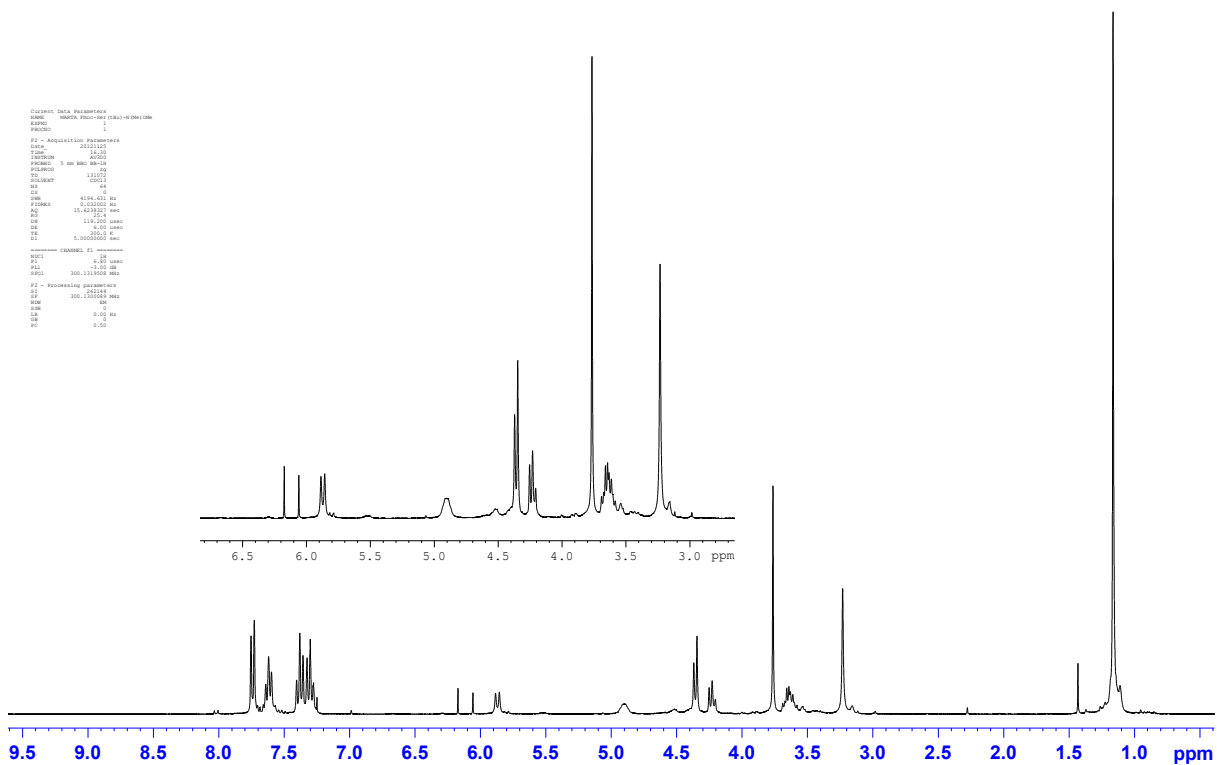

Figure S2: <sup>13</sup>C NMR spectrum of 2

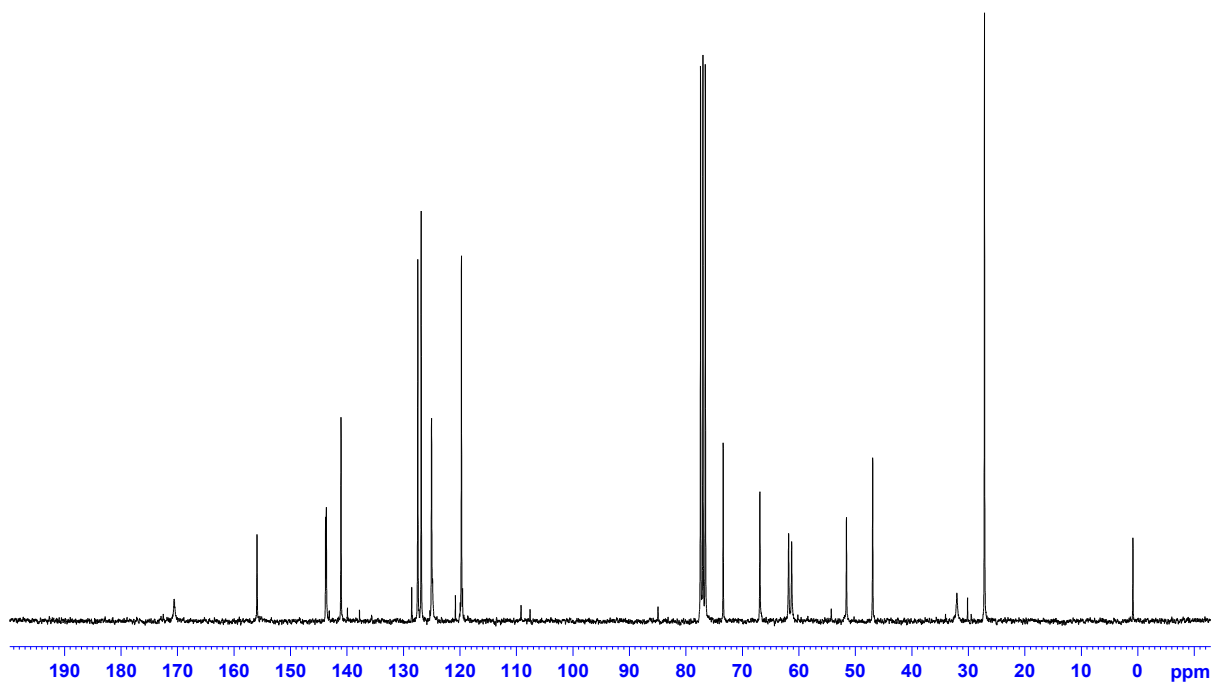

Figure S3: <sup>1</sup>H NMR spectrum of **3**

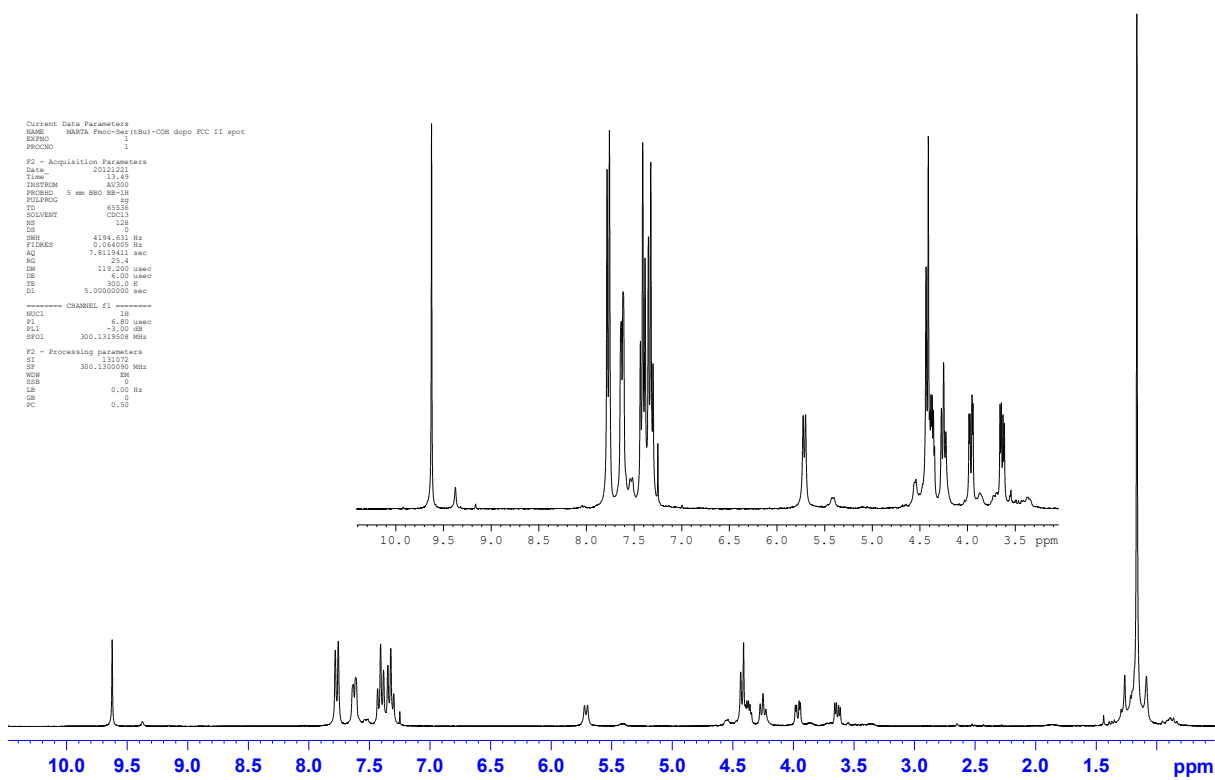

Figure S4: <sup>13</sup>C NMR spectrum of **3**

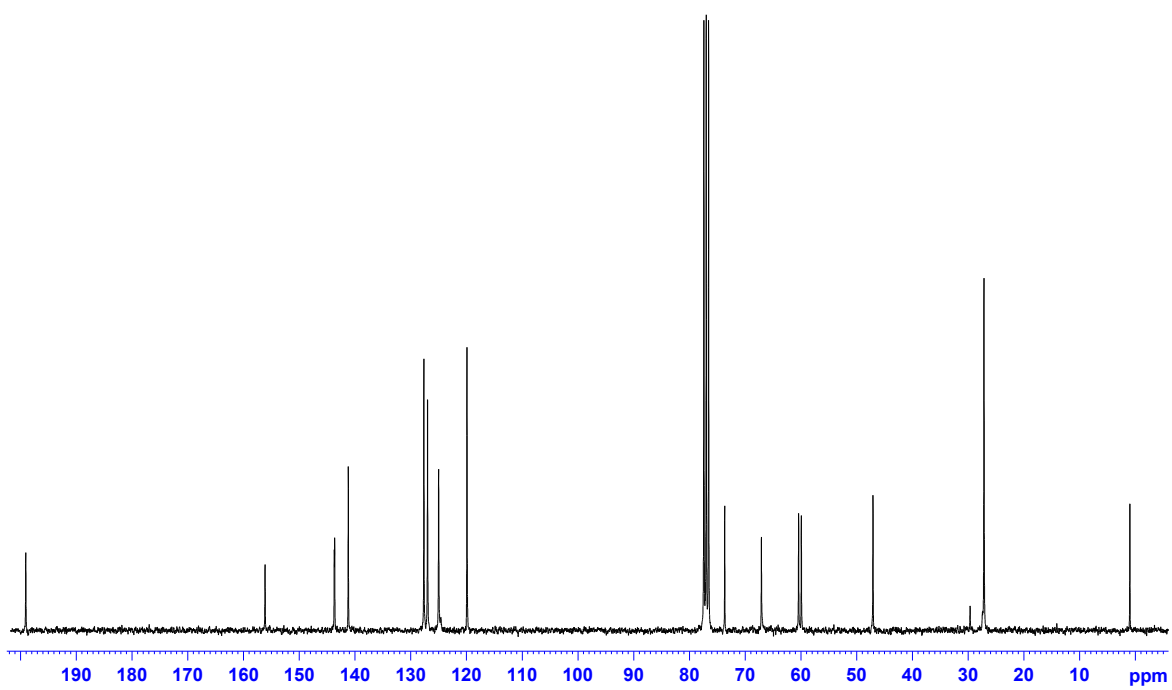

Figure S5:  $^1\text{H}$  NMR spectrum of 4

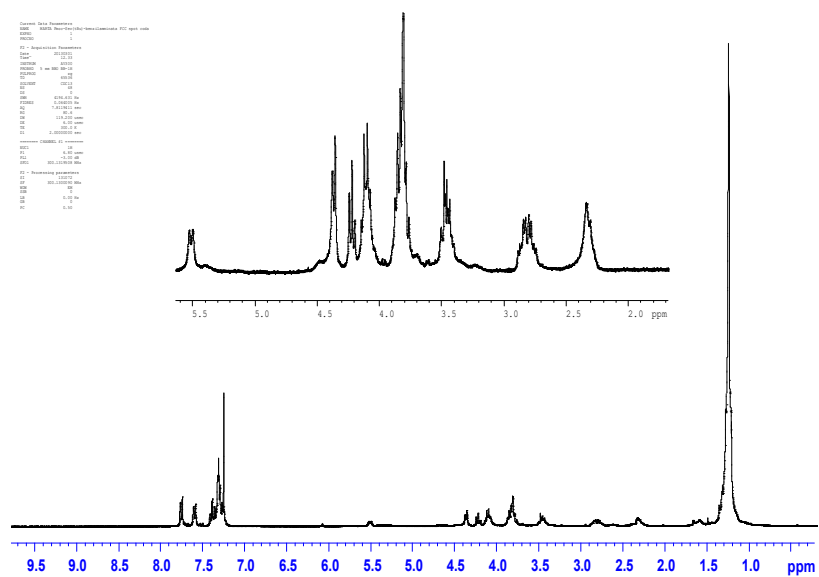

Figure S6:  $^{13}\text{C}$  NMR spectrum of 4

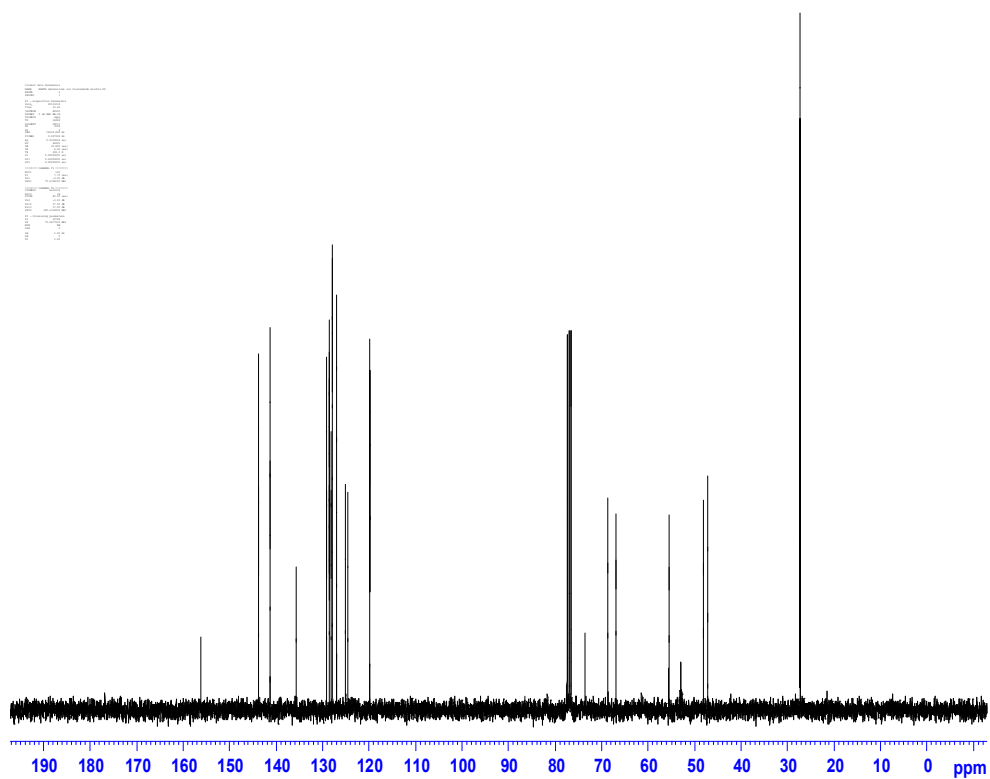





Figure S11:  $^1\text{H}$  NMR spectrum of 7

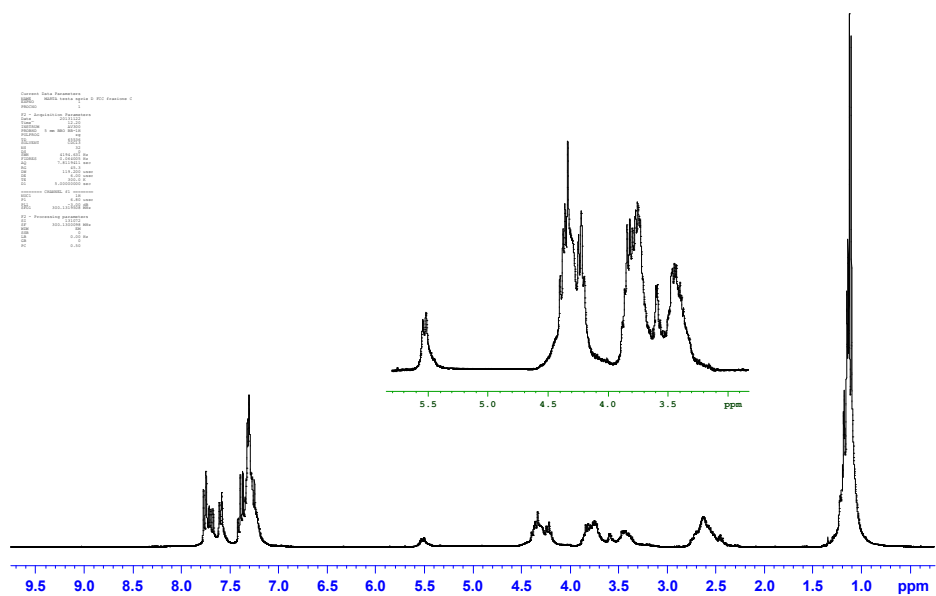

Figure S12:  $^{13}\text{C}$  NMR spectrum of 7

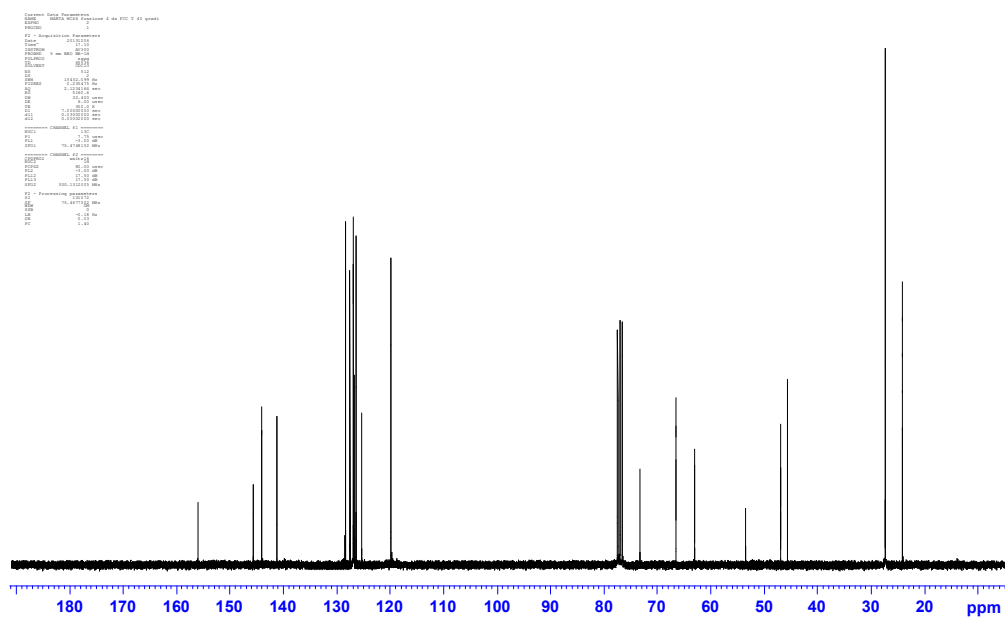

Figure S13:  $^1\text{H}$  NMR spectrum of 8

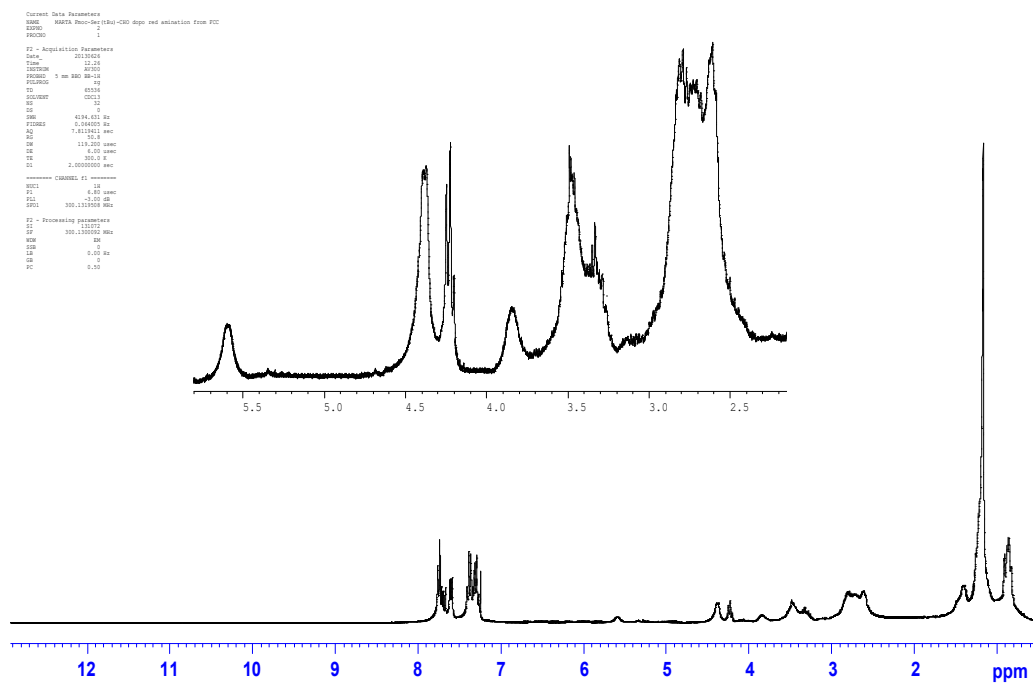

Figure S14:  $^{13}\text{C}$  NMR spectrum of 8

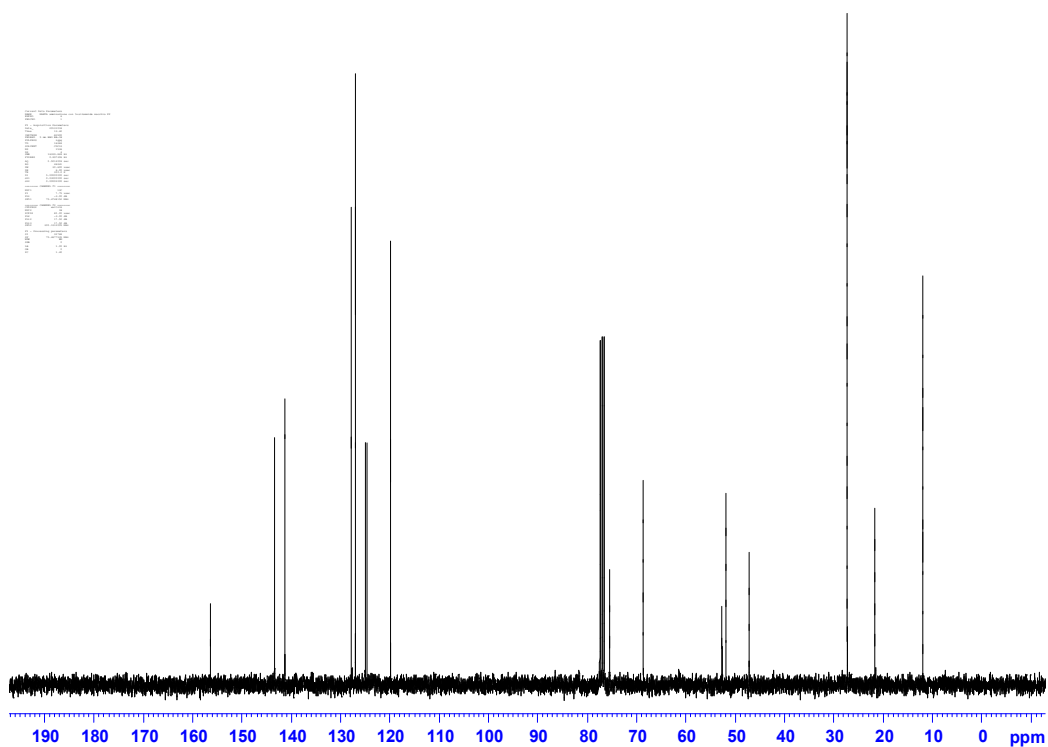



Figure S15: <sup>1</sup>H NMR spectrum of 9

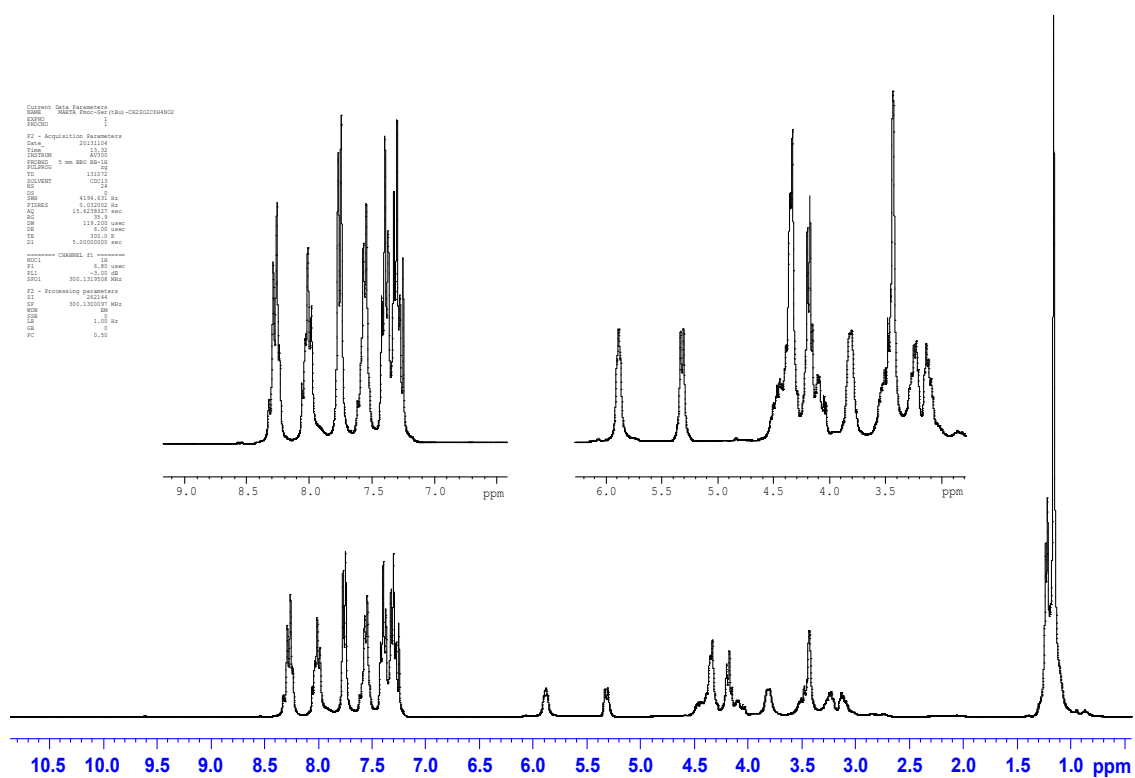

Figure S16: <sup>13</sup>C NMR spectrum of 9

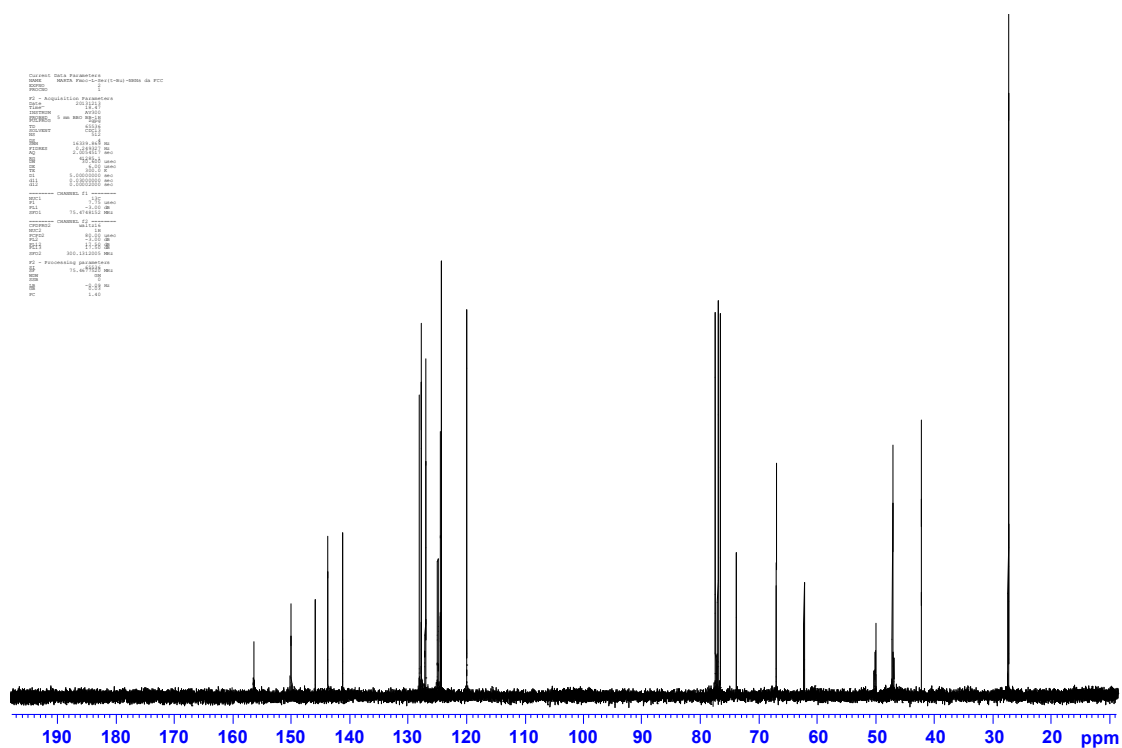

Figure S17: <sup>1</sup>H NMR spectrum of **10**

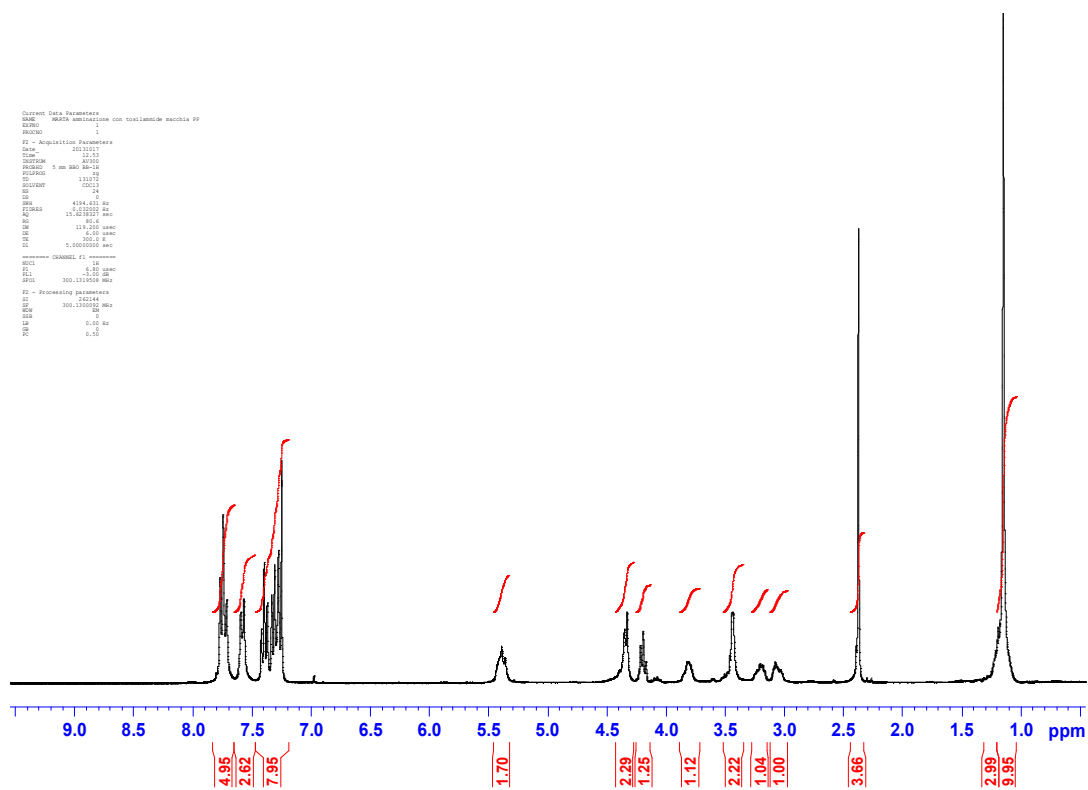

Figure S18: <sup>13</sup>C NMR spectrum of **10**

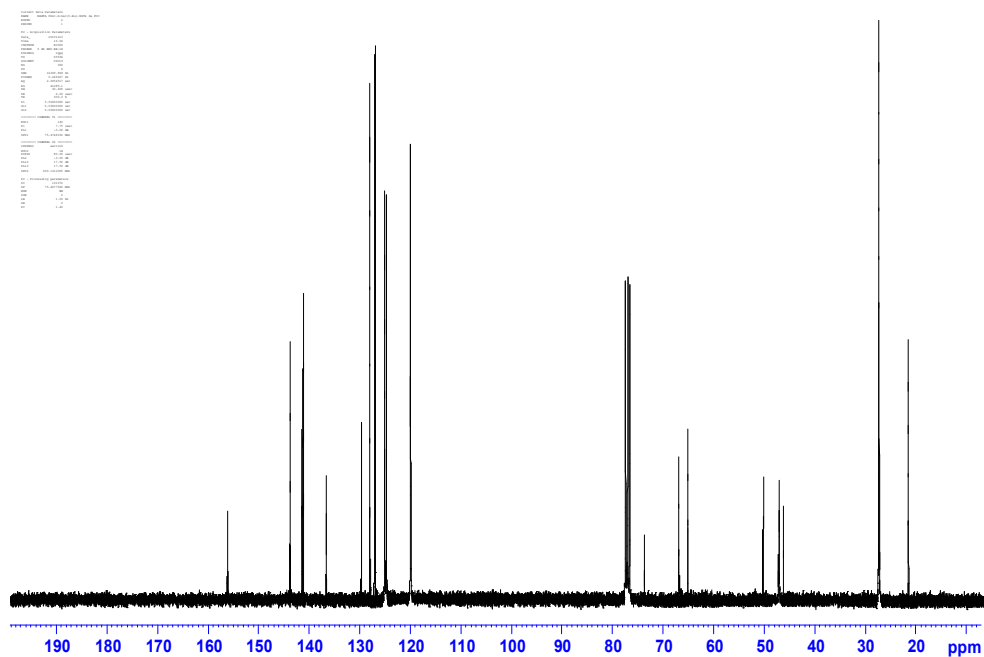

Figure S19:  $^1\text{H}$  NMR spectrum of **11**

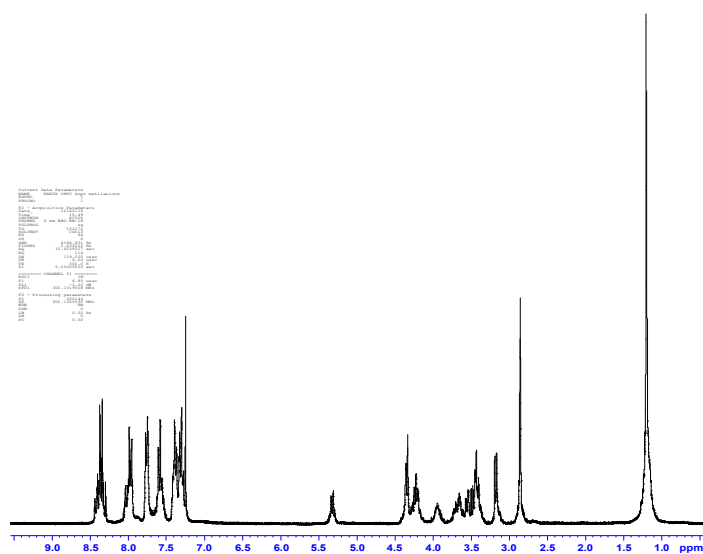

Figure S20:  $^{13}\text{C}$  NMR spectrum of **11**

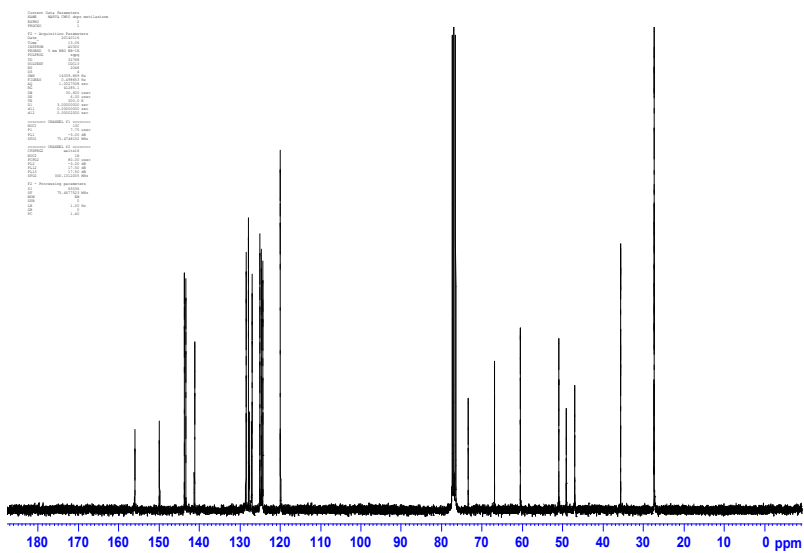

Figure S21: <sup>1</sup>H NMR spectrum of **12**

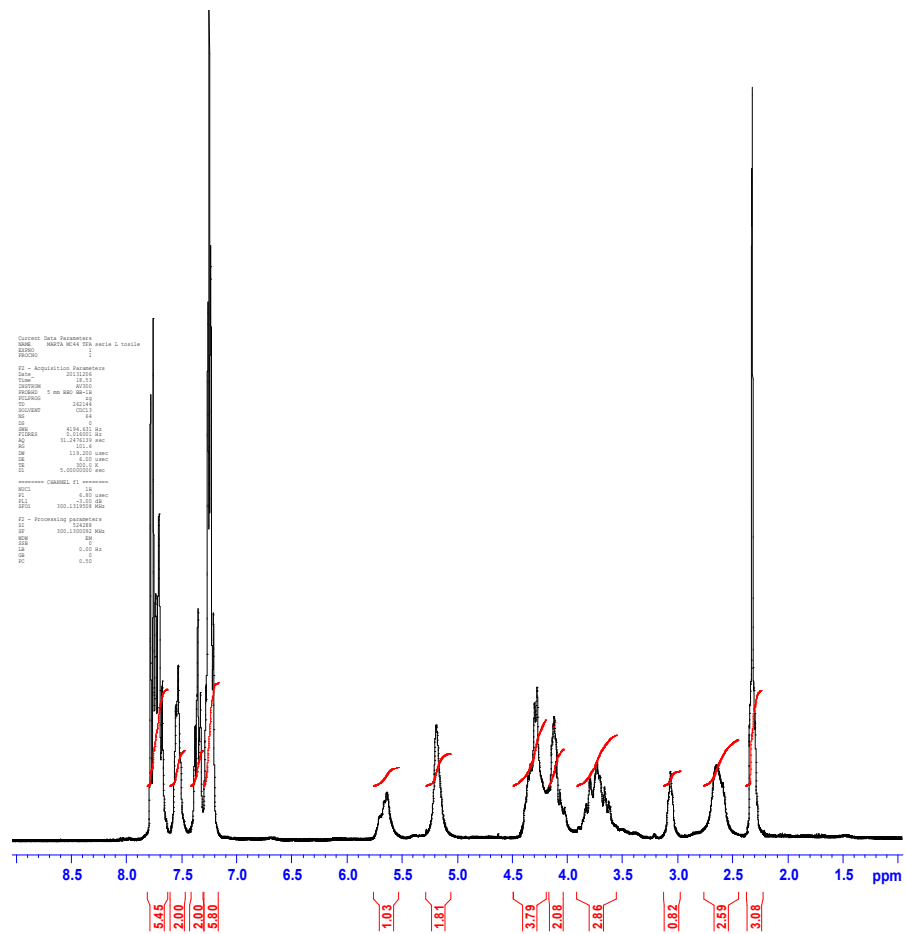

Figure S22: <sup>13</sup>C NMR spectrum of **12**

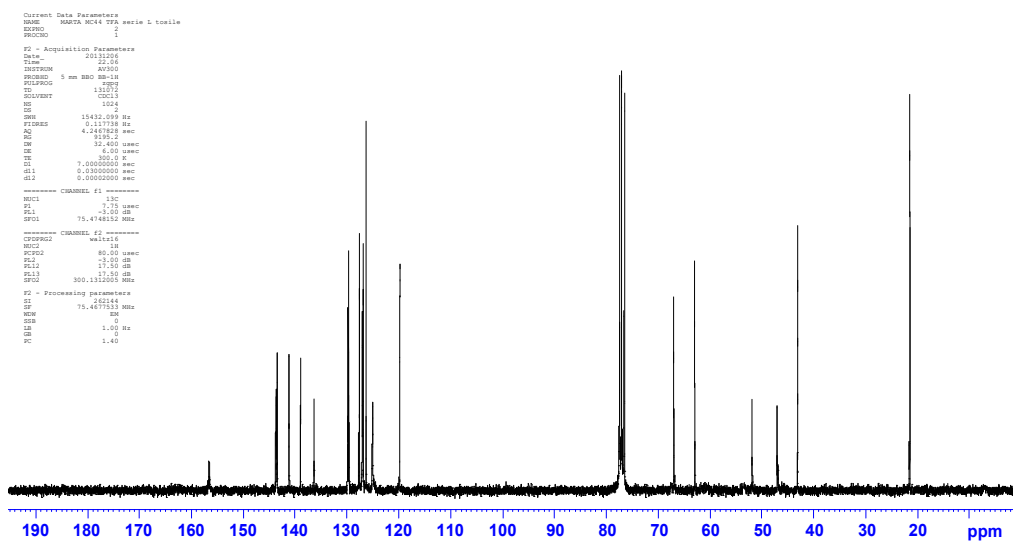

Figure S23: <sup>1</sup>H NMR spectrum of 13

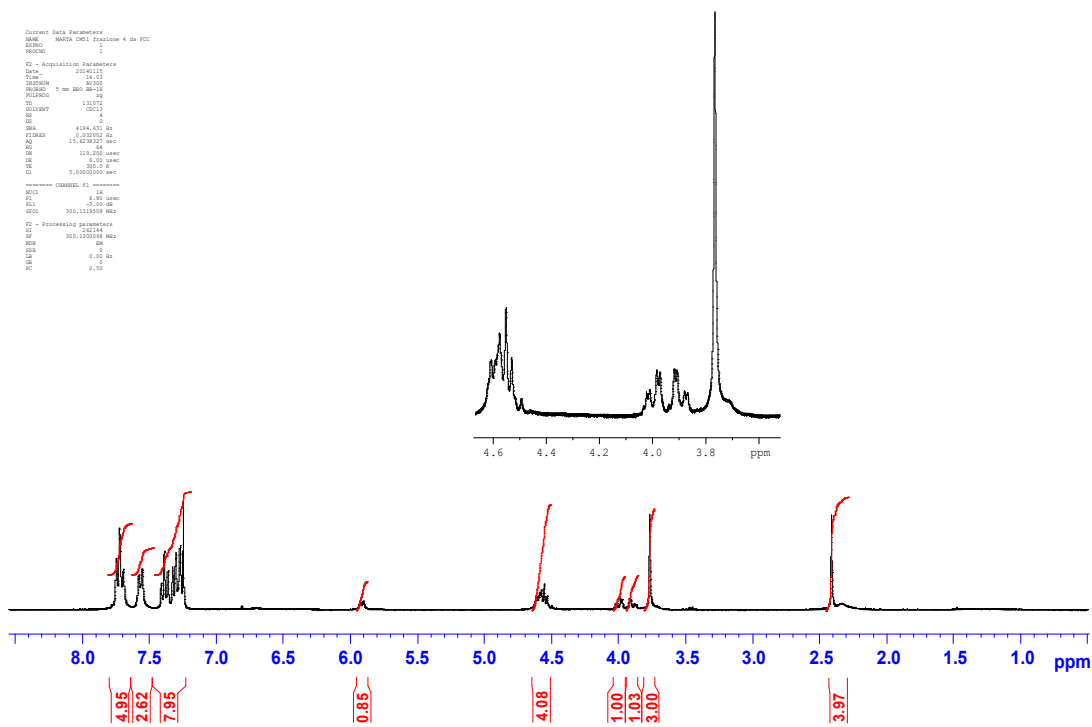

Figure S24: <sup>13</sup>C NMR spectrum of 13

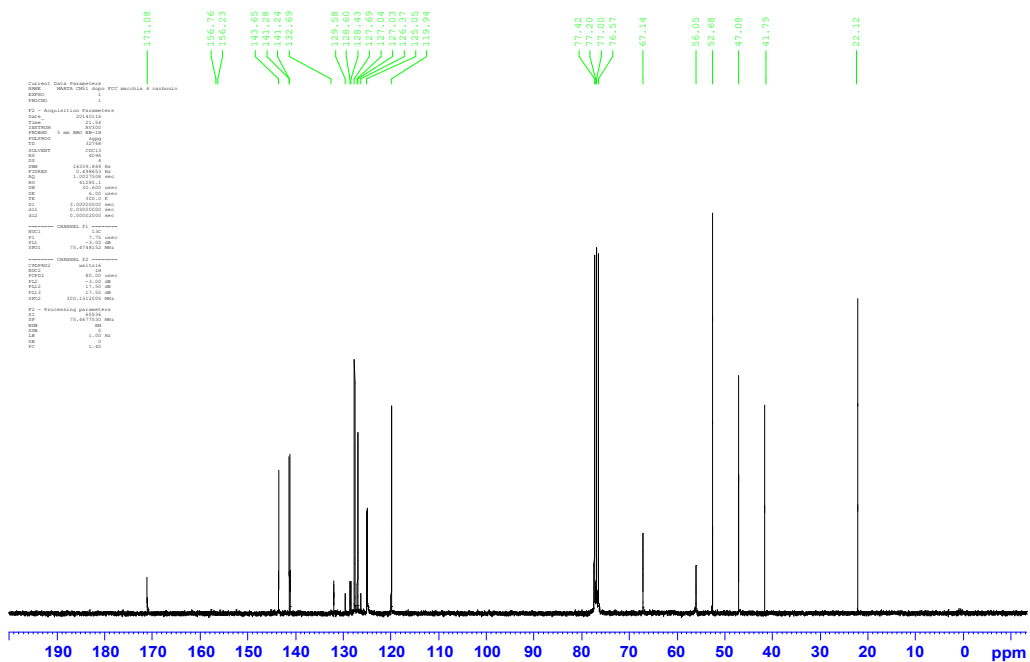

Figure S25:  $^1\text{H}$  NMR spectrum of **20**

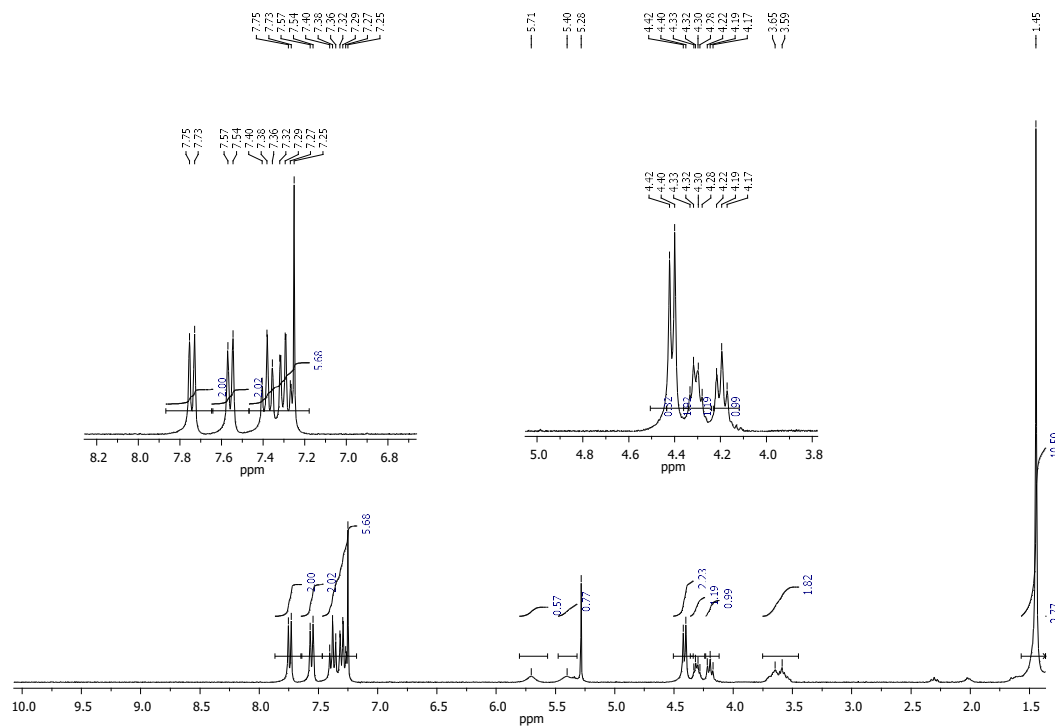

Figure S26:  $^{13}\text{C}$  NMR spectrum of **20**

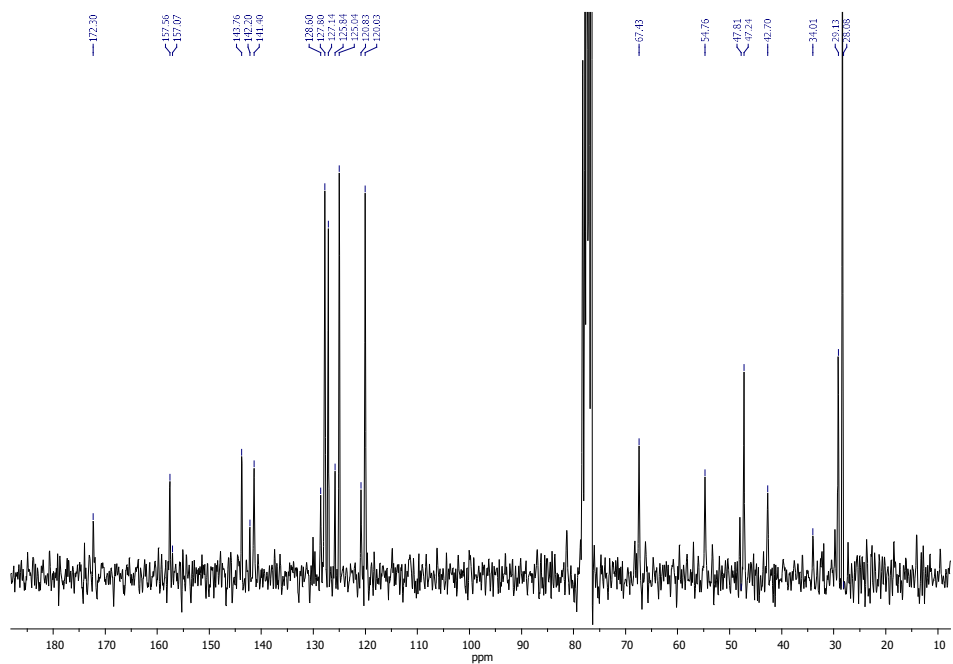

Figure S27: <sup>1</sup>H NMR spectrum of **21**

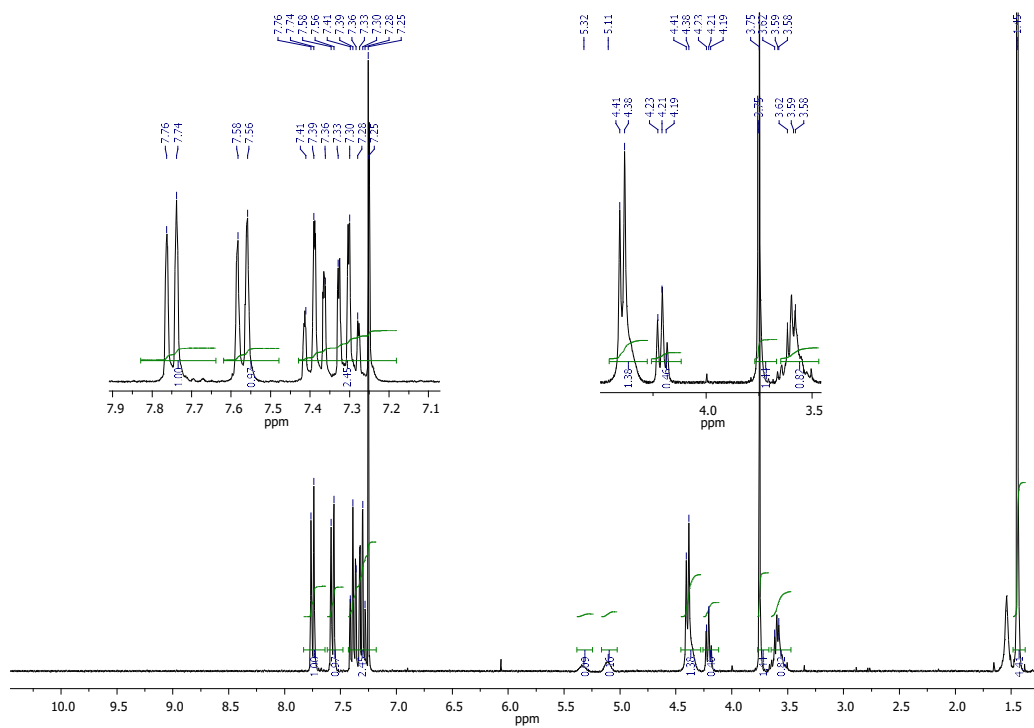

Figure S28: <sup>13</sup>C NMR spectrum of **21**

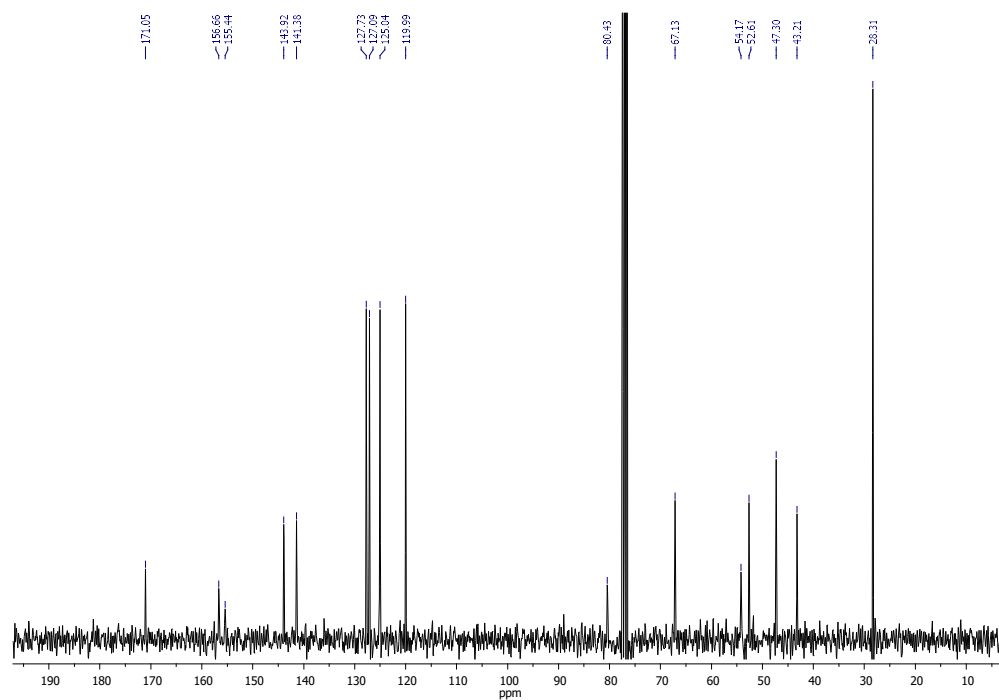

Figure S29: ESI(+) MS spectrum of 4

C:\Xcalibur\data\FAB\O'screening\Carlo2

7/4/2013 5:01:28 PM

Carlo2 #46-91 RT: 0.65-1.46 AV: 46 NL: 3.85E5  
T: +p ESI Full ms2 459.000 [100.070-500.000]

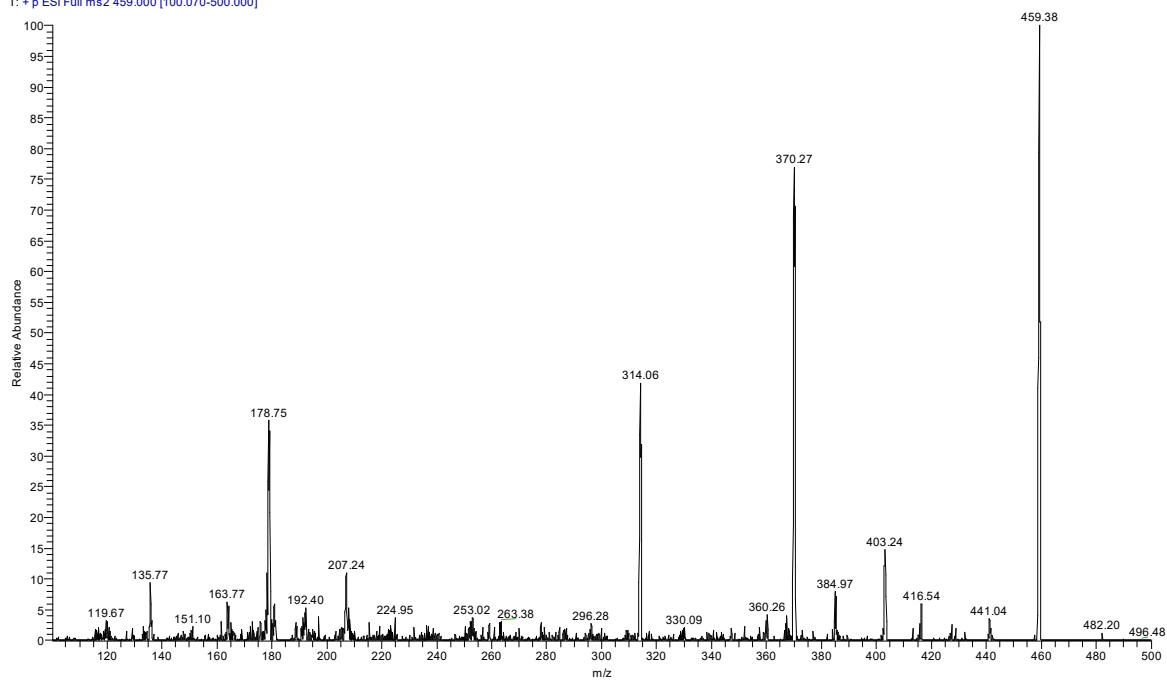

Figure S30: ESI(+) MS spectrum of 5

C:\Xcalibur\data\FAB\O'sample29bis

10/28/2013 5:00:28 PM

sample29bis #84-272 RT: 1.45-4.44 AV: 189 NL: 8.78E3  
T: -p ESI Full ms2 557.500 [100.070-650.000]

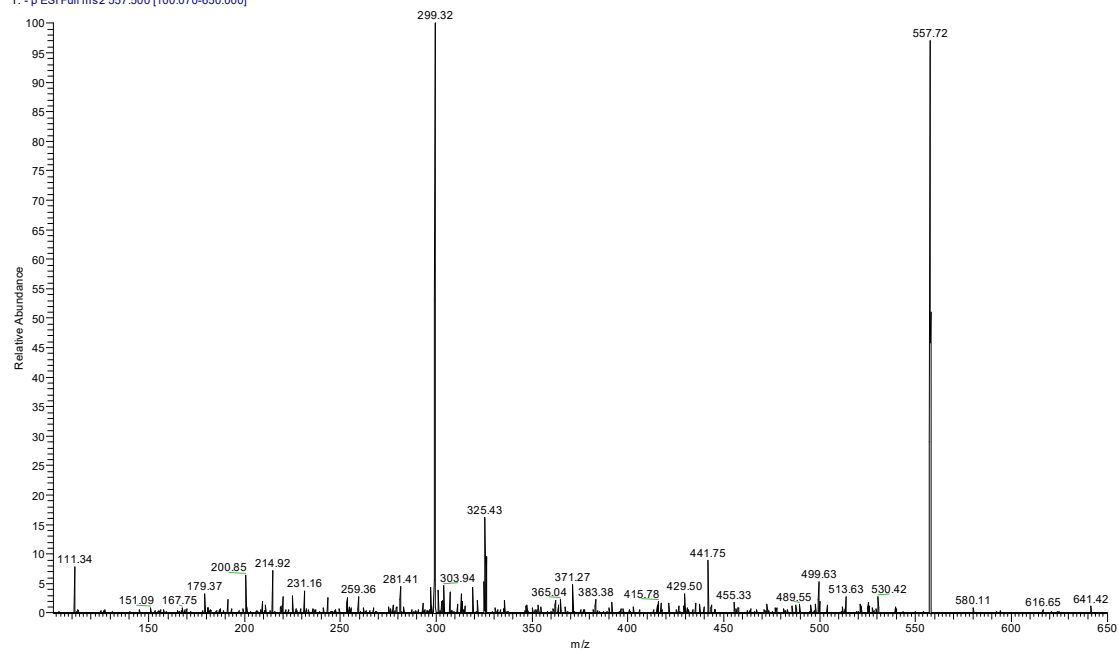



Figure S31: ESI(+) MS spectrum of 6

C:\xcalibur\data\FABIO\cesarino\CM46L

12/18/2013 1:34:23 PM

CM46L #1394-1404 RT: 12.44-12.53 AV: 11 NL: 7.30E6  
F: +p ESI Q1MS [150.000-800.000]

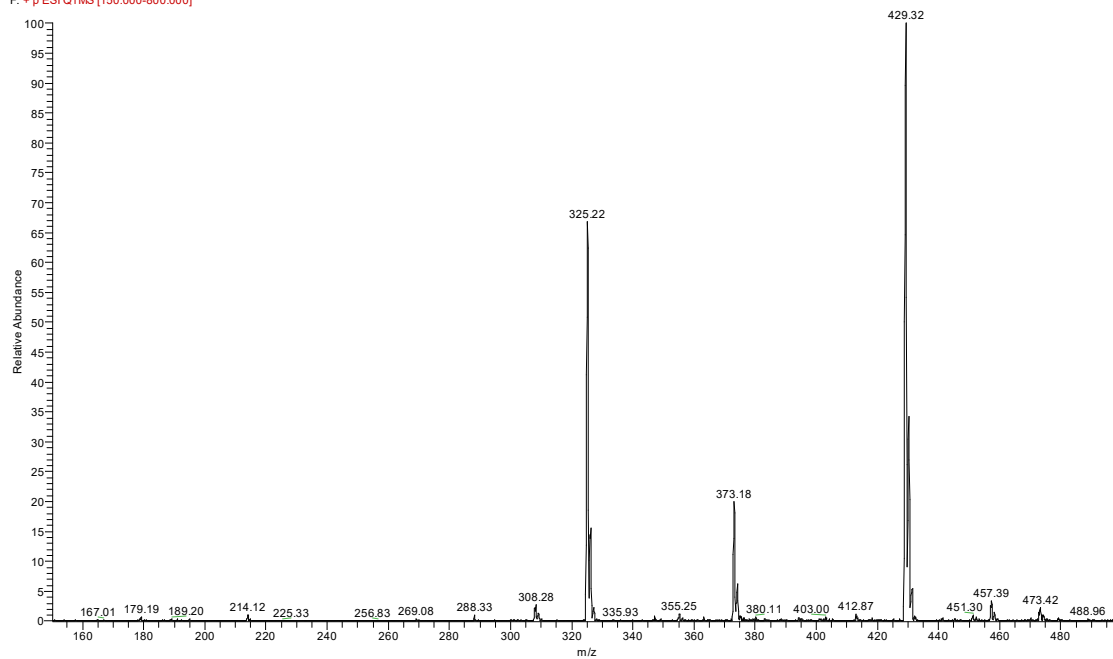

Figure S32: ESI(+) MS spectrum of 7

C:\xcalibur\data\FABIO\cesarino\CM40D

12/18/2013 1:51:13 PM

CM40D #1377-1389 RT: 12.29-12.39 AV: 13 NL: 5.96E5  
F: +p ESI Q1MS [150.000-800.000]

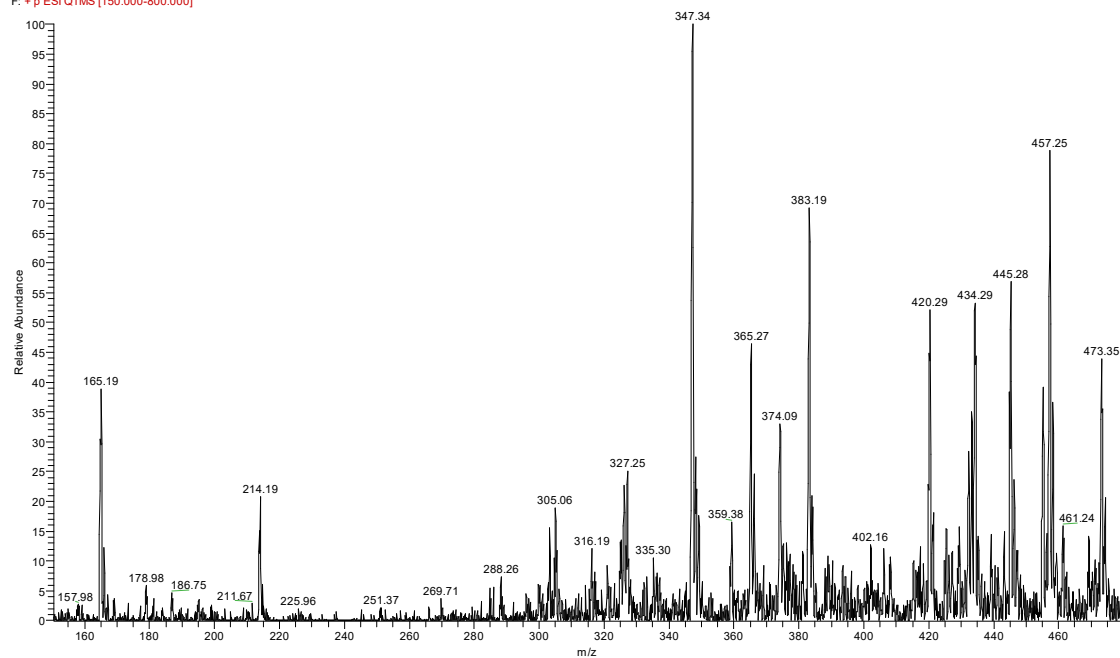

Figure S33: ESI(+) MS spectrum of 8

C:\Xcalibur\data\FABIO's screening\Carlo1

7/4/2013 4:55:28 PM

Carlo1 #203-221 RT: 2.55-2.84 AV: 19 NL: 2.32E6  
T: + p ESI Full ms2 411.000 [100.070-450.000]

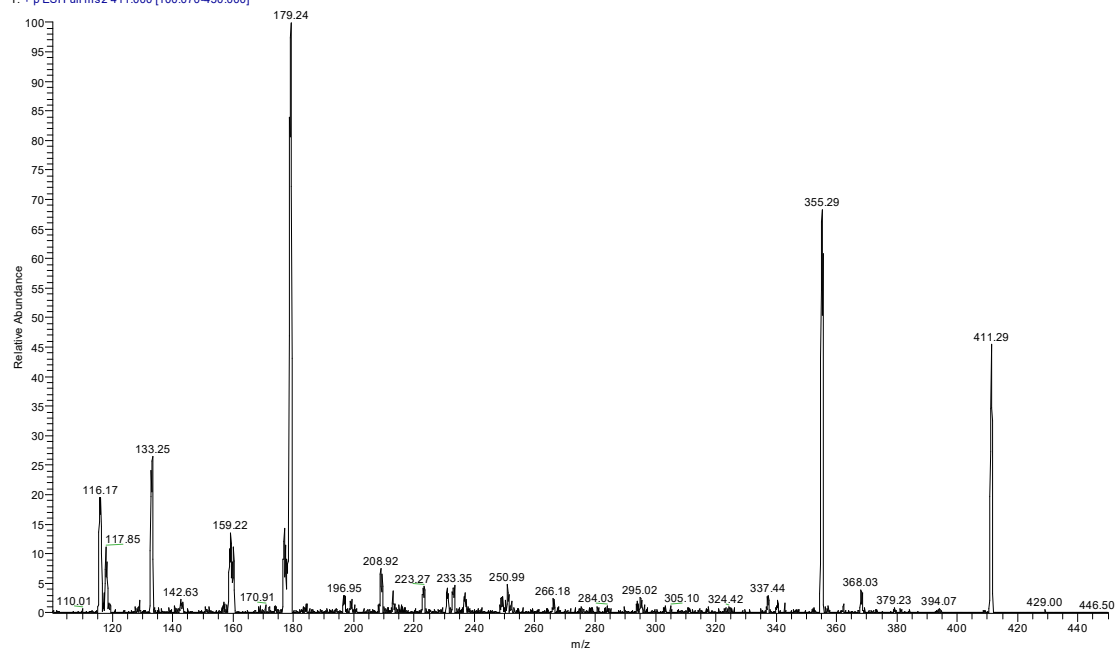

Figure S34: ESI(+) MS spectrum of 9

C:\Xcalibur\data\FABIOAA\_B2\Carlo\_34

12/16/2013 4:47:10 PM

Carlo\_34 #829-944 RT: 3.49-5.15 AV: 96 NL: 5.68E5  
T: + p ESI Full ms2 554.000 [70.070-600.000]

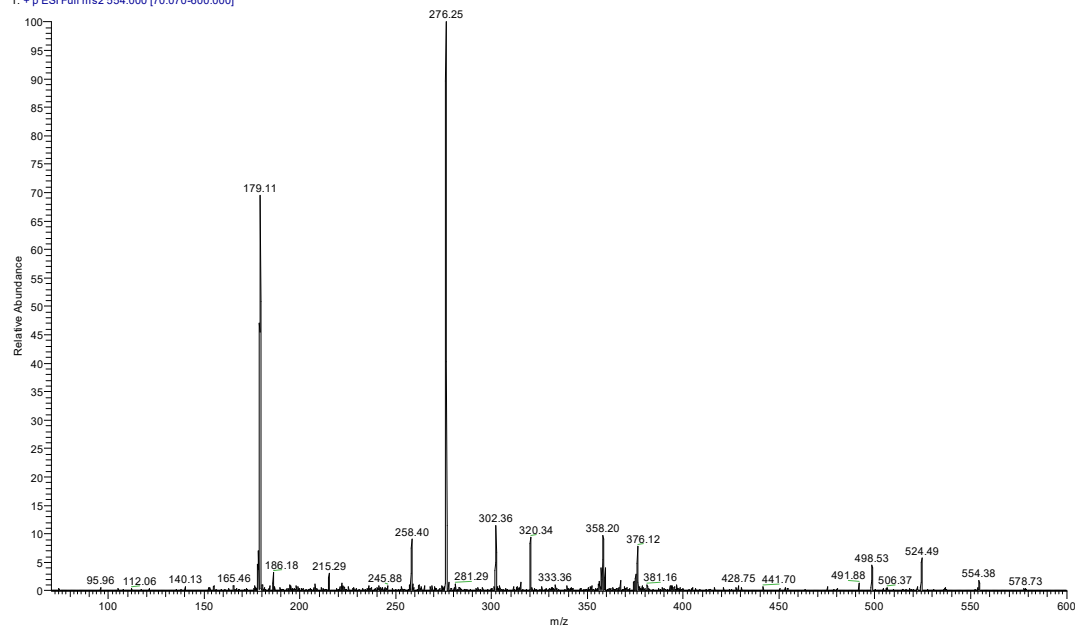

Figure S35: ESI(+) MS spectrum of 10

C:\xcalibur\data\FABIOAA\_BZ\Carlo\_CM#9

12/16/2013 4:57:18 PM

Carlo\_CM#9 #126-219 RT: 1.57-3.19 AV: 94 NL: 4.90E5  
T: + p ESI Full ms2 523.000 [70.070-600.000]

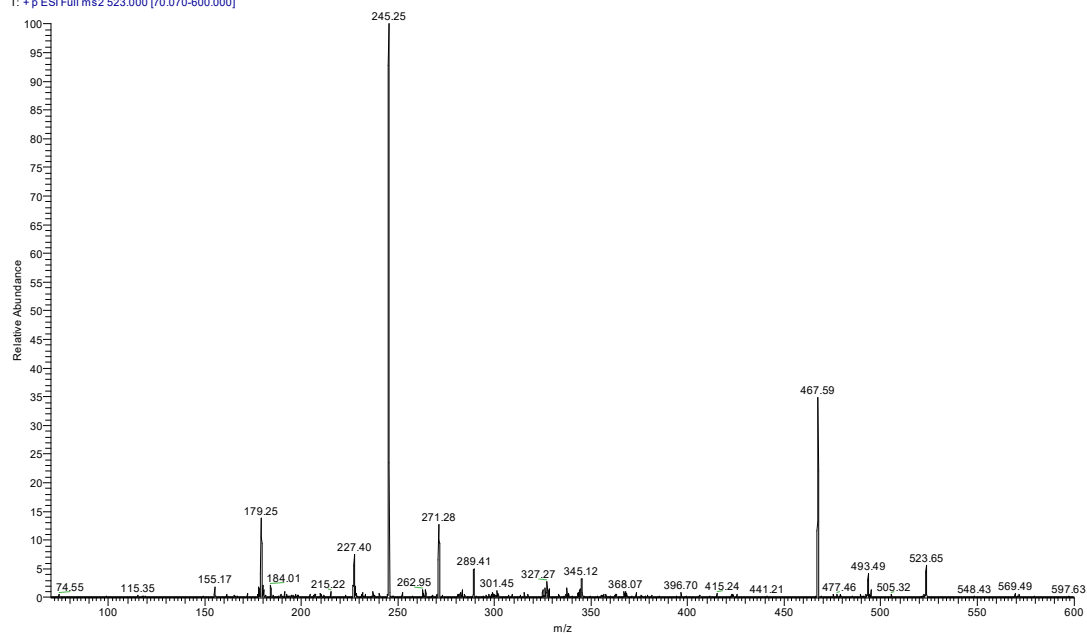

Figure S36: ESI(+) MS spectrum of 11

C:\xcalibur\data\FABIOAA\_BZ\carlo50

12/18/2013 12:38:21 PM

carlo50 #108-111 RT: 1.73-1.81 AV: 4 NL: 1.64E4  
T: + p ESI Full ms2 567.000 [100.070-600.000]

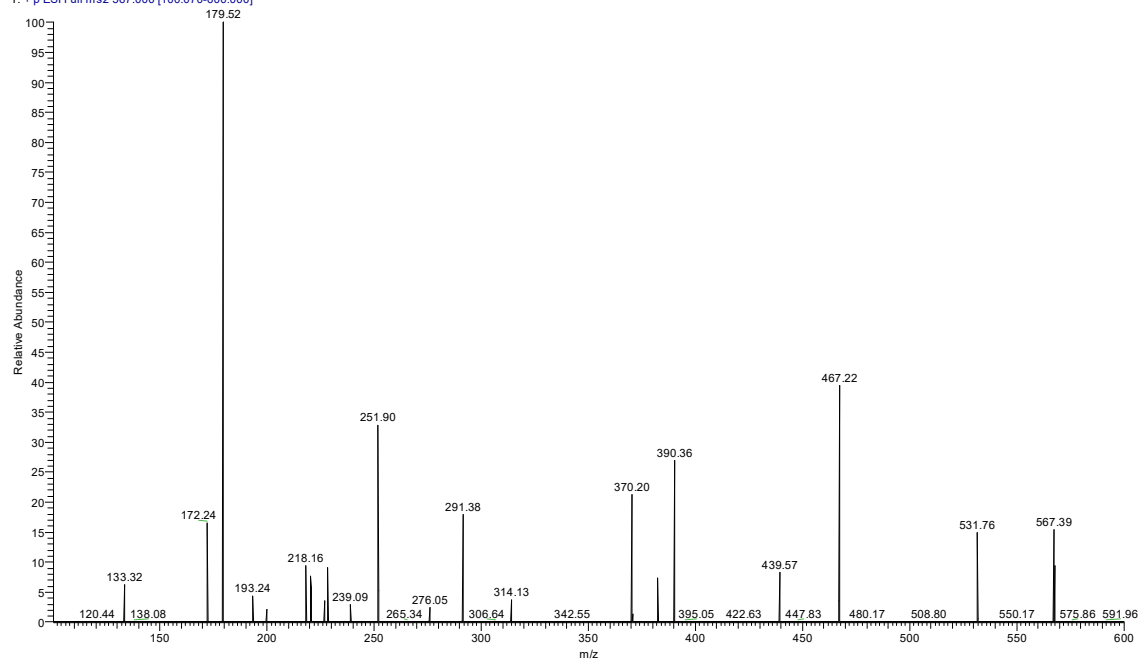

Figure S37: RP U-HPLC/MS analysis of **23** and **24**

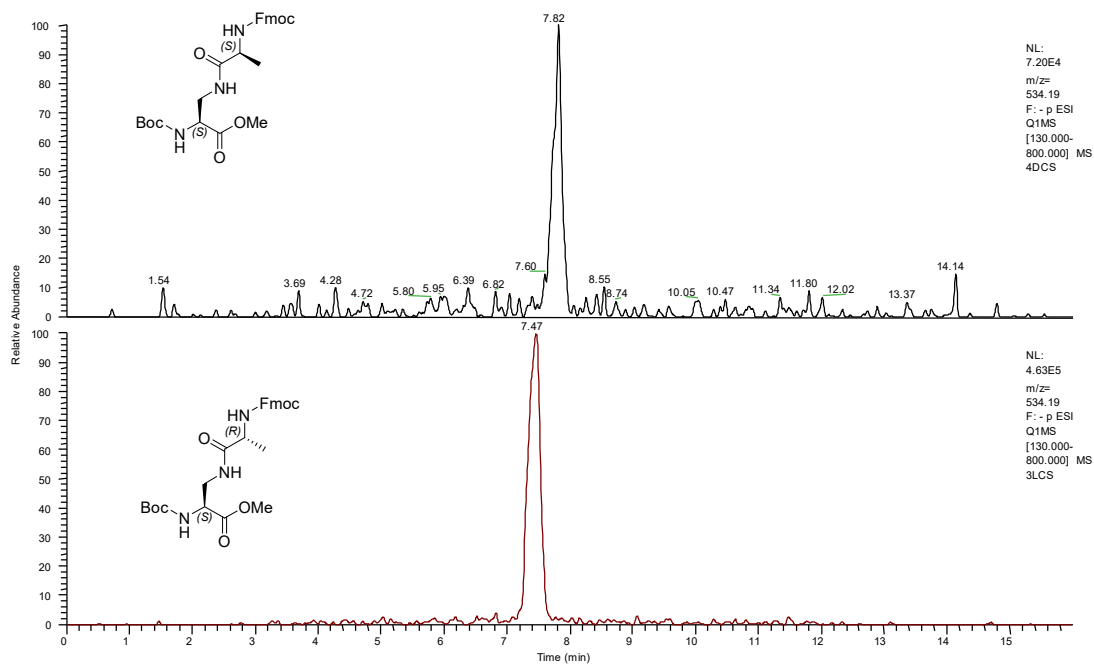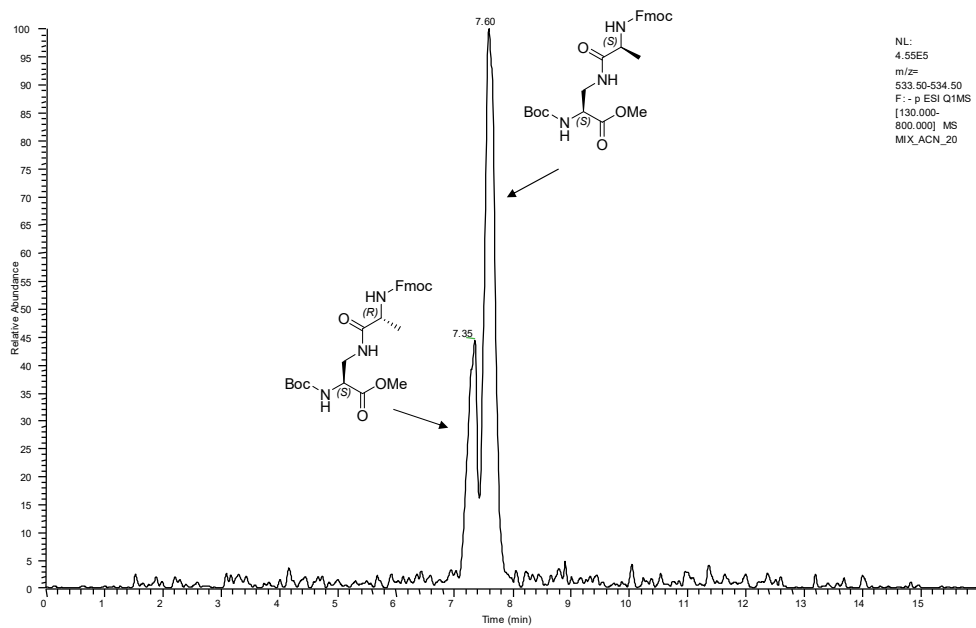

Figure S38: ESI(+) MS spectrum of **23**

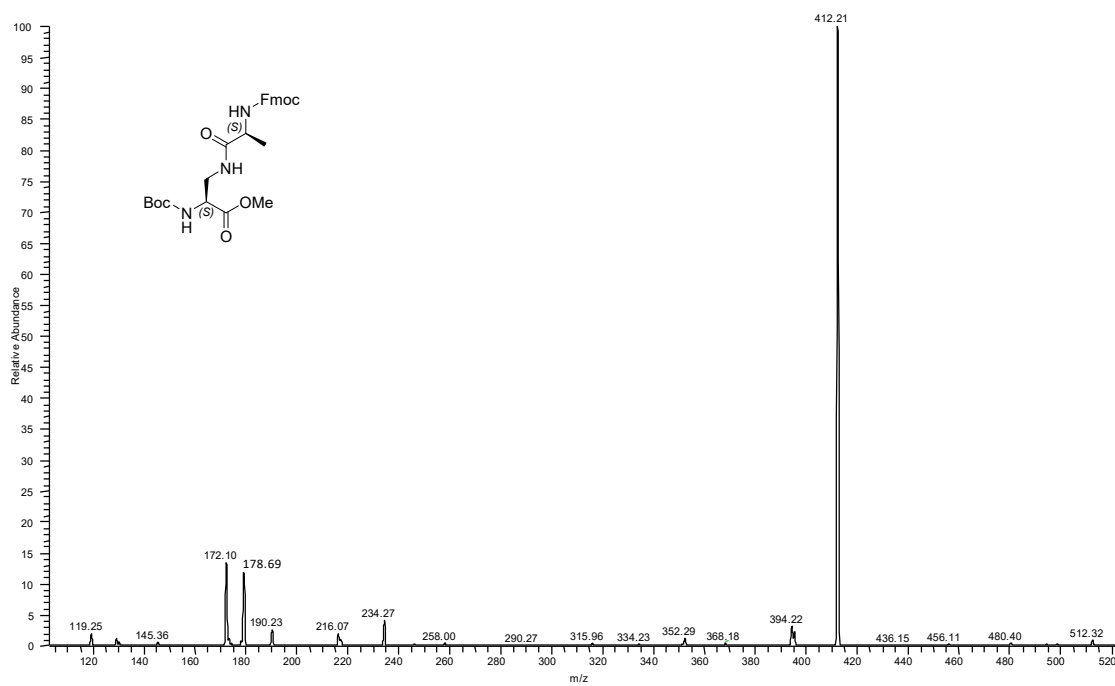

Figure S39: ESI(+) MS spectrum of **24**

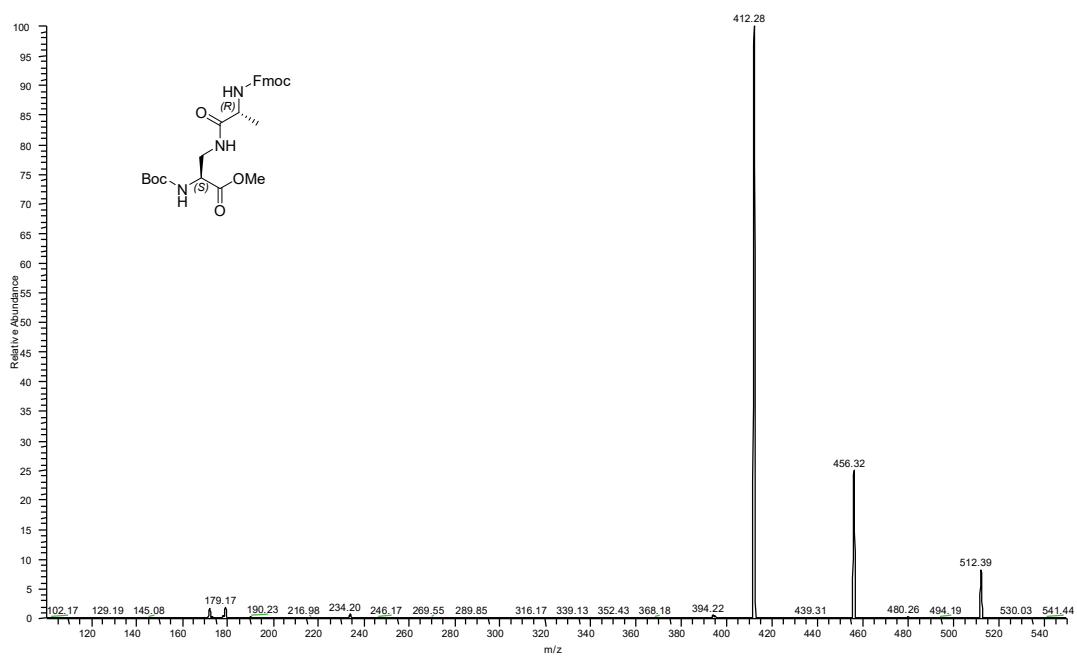

Supplement: molecules-25-01313-s001.pdf [file molecules-25-01313-s001.pdf]
